# Supplementary material
Source: PubMed Central journal article supplement (PMC6961810)
Supplement: NIHMS1545401-supplement-1.pdf [file NIHMS1545401-supplement-1.pdf]

## Use of a fluorescence assay to determine relative affinities of semisynthetic aminoglycosides to small RNAs representing bacterial and mitochondrial A sites

Prabuddha Waduge, Girish C. Sati, David Crich, and Christine S. Chow

### Supplementary material

#### Table of contents

|            |                                                                                                      |    |
|------------|------------------------------------------------------------------------------------------------------|----|
| Figure S1. | Aminoglycosides binding to the fluorescein-tagged bacterial A-site duplex RNA (wt-bac) construct.    | S2 |
| Figure S2. | Aminoglycosides binding to the fluorescein-tagged mitochondrial A-site duplex RNA (wt-mt) construct. | S3 |
| Figure S3. | Aminoglycosides binding to fluorescein-tagged mutant mitochondrial A-site RNA (mut-mt) construct.    | S4 |
| Figure S4. | Aminoglycosides binding to fluorescein-tagged bacterial A-site duplex RNA (wt-bac) construct.        | S5 |
| Figure S5. | Aminoglycosides binding to fluorescein-tagged mitochondrial A-site duplex RNA (wt-mt) construct.     | S6 |
| Figure S6. | Aminoglycosides binding to fluorescein-tagged mutant mitochondrial A-site RNA (mut-mt) construct.    | S7 |

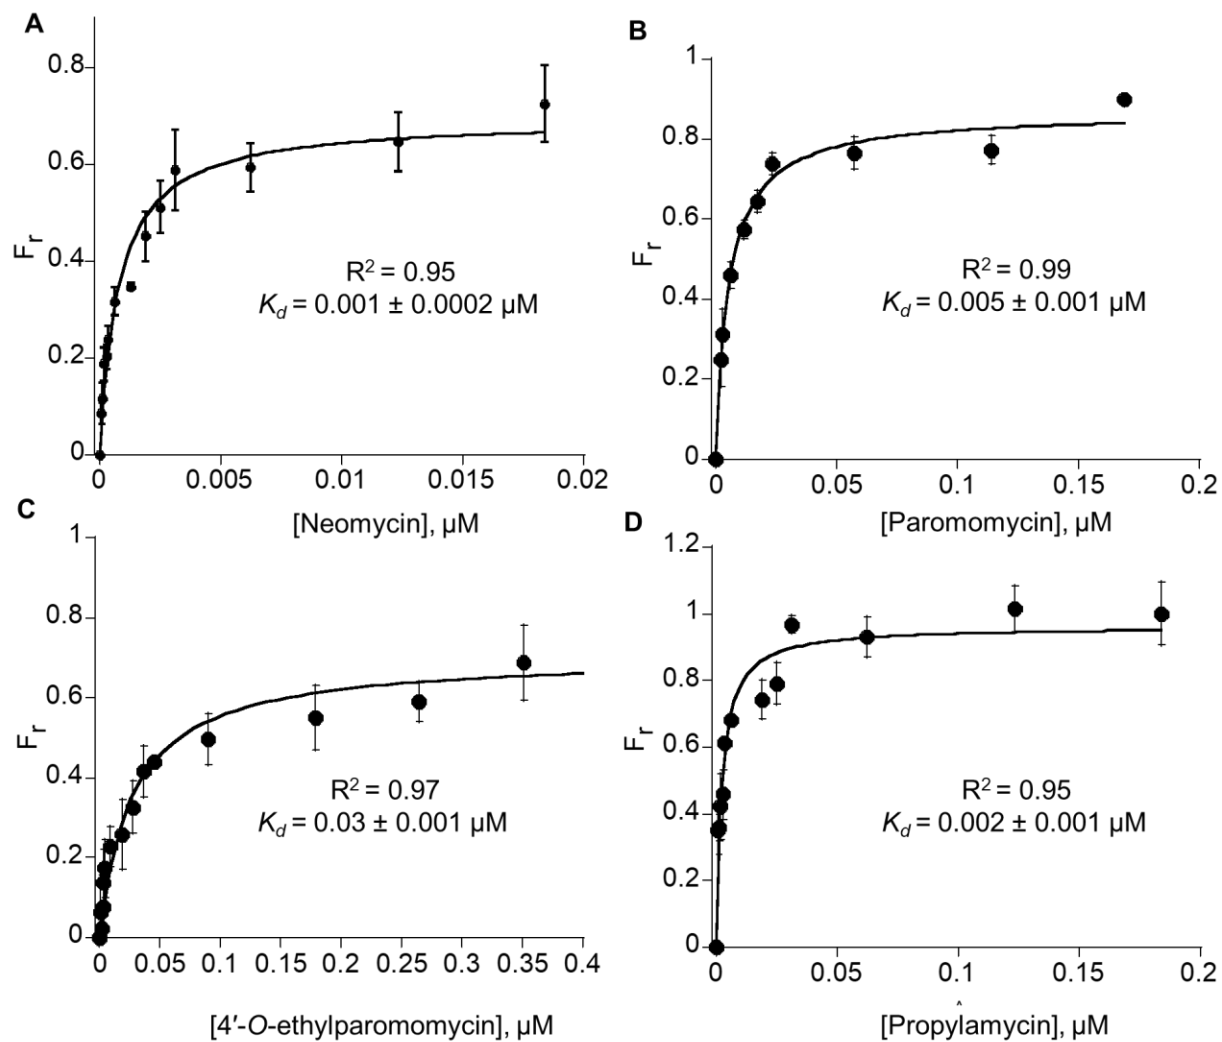

**Figure S1. Aminoglycosides binding to the fluorescein-tagged bacterial A-site duplex RNA (wt-bac) construct.** Binding curves of fraction bound ( $F_r$ ) as a function of neomycin (A), paromomycin (B), 4'-O-ethylparomomycin (C), and propylamycin (D) concentration fitted to Equation 3 are shown ( $R^2 = 0.97, 0.99, 0.97,$  and  $0.95,$  respectively).

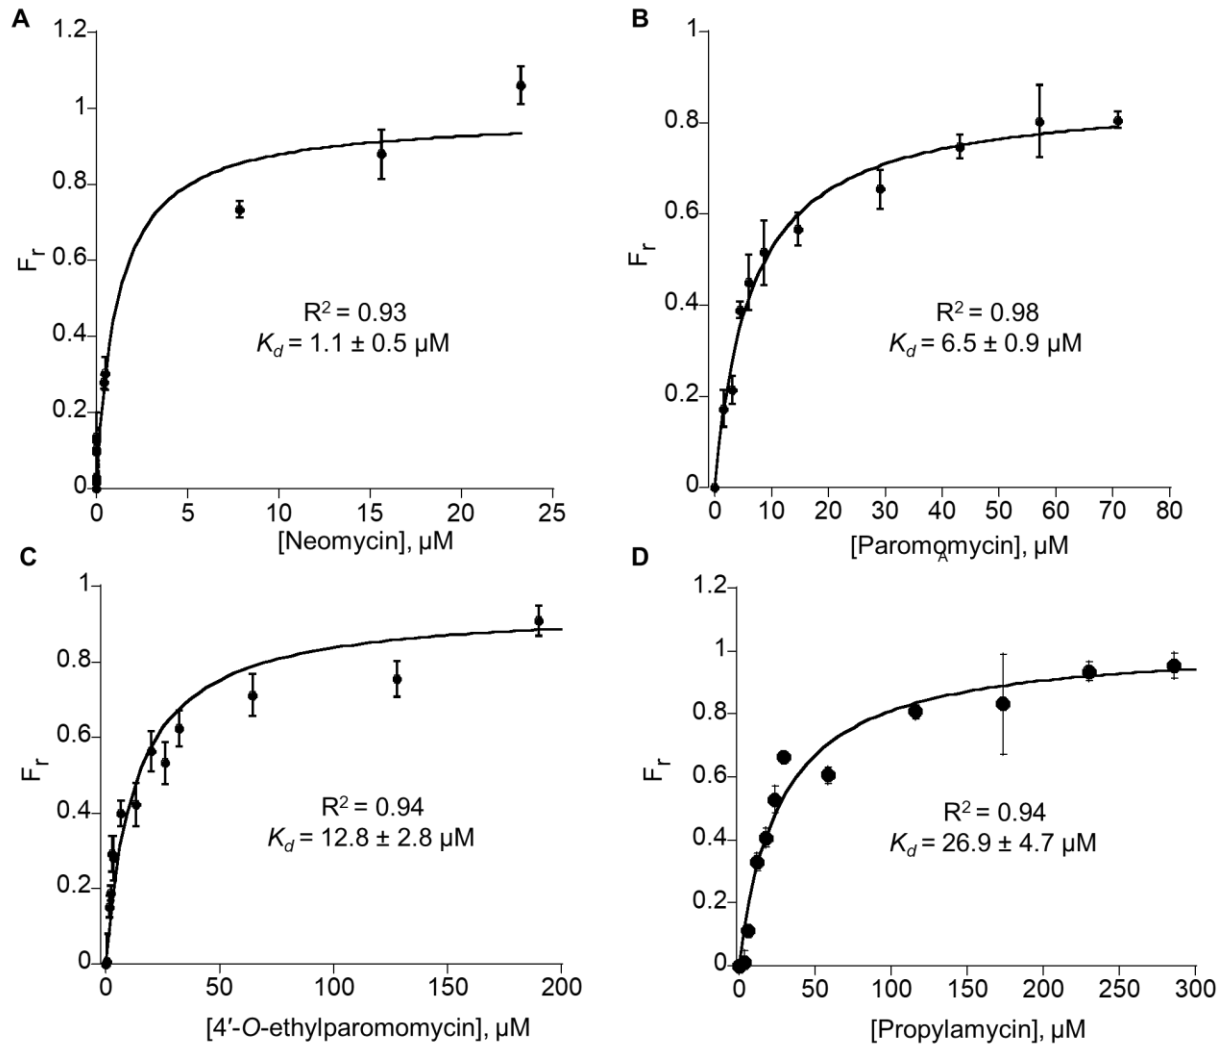

**Figure S2. Aminoglycosides binding to the fluorescein-tagged mitochondrial A-site duplex RNA (wt-mt) construct.** Binding curves of fraction bound ( $F_r$ ) as a function of neomycin (A), paromomycin (B), 4'-O-ethylparomomycin (C), and propylamycin (D) concentration fitted to Equation 3 are shown ( $R^2 = 0.93, 0.98, 0.94,$  and  $0.94,$  respectively).

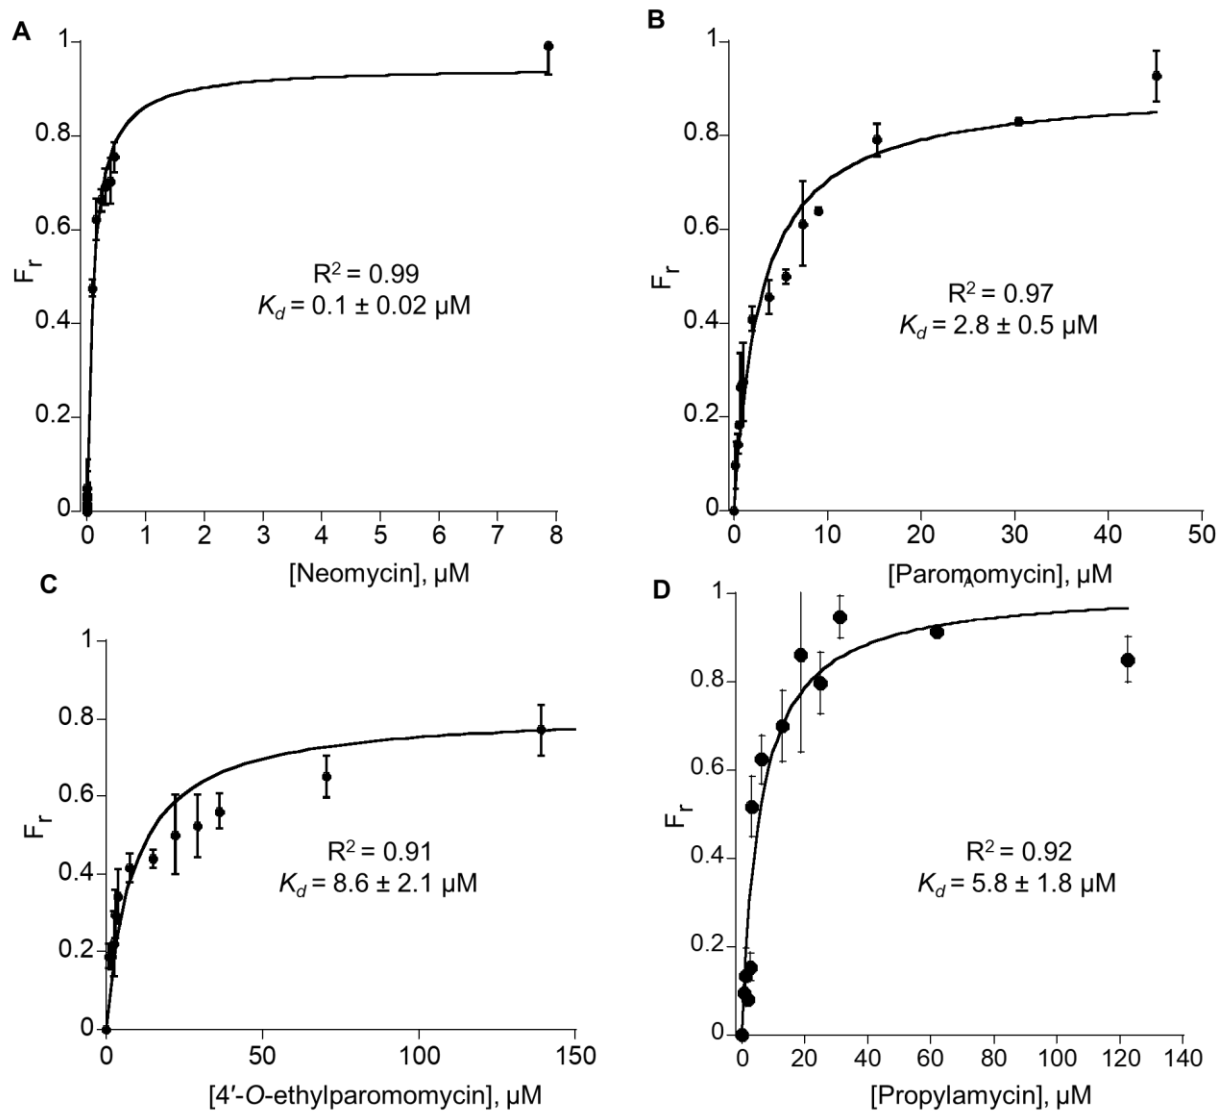

**Figure S3. Aminoglycosides binding to fluorescein-tagged mutant mitochondrial A-site RNA (mut-mt) construct.** Binding curves of fraction bound ( $F_r$ ) as a function of neomycin (A), paromomycin (B), 4'-O-ethylparomomycin (C), and propylamycin (D) concentration fitted to Equation 3 are shown ( $R^2 = 0.99, 0.97, 0.91,$  and  $0.92,$  respectively).

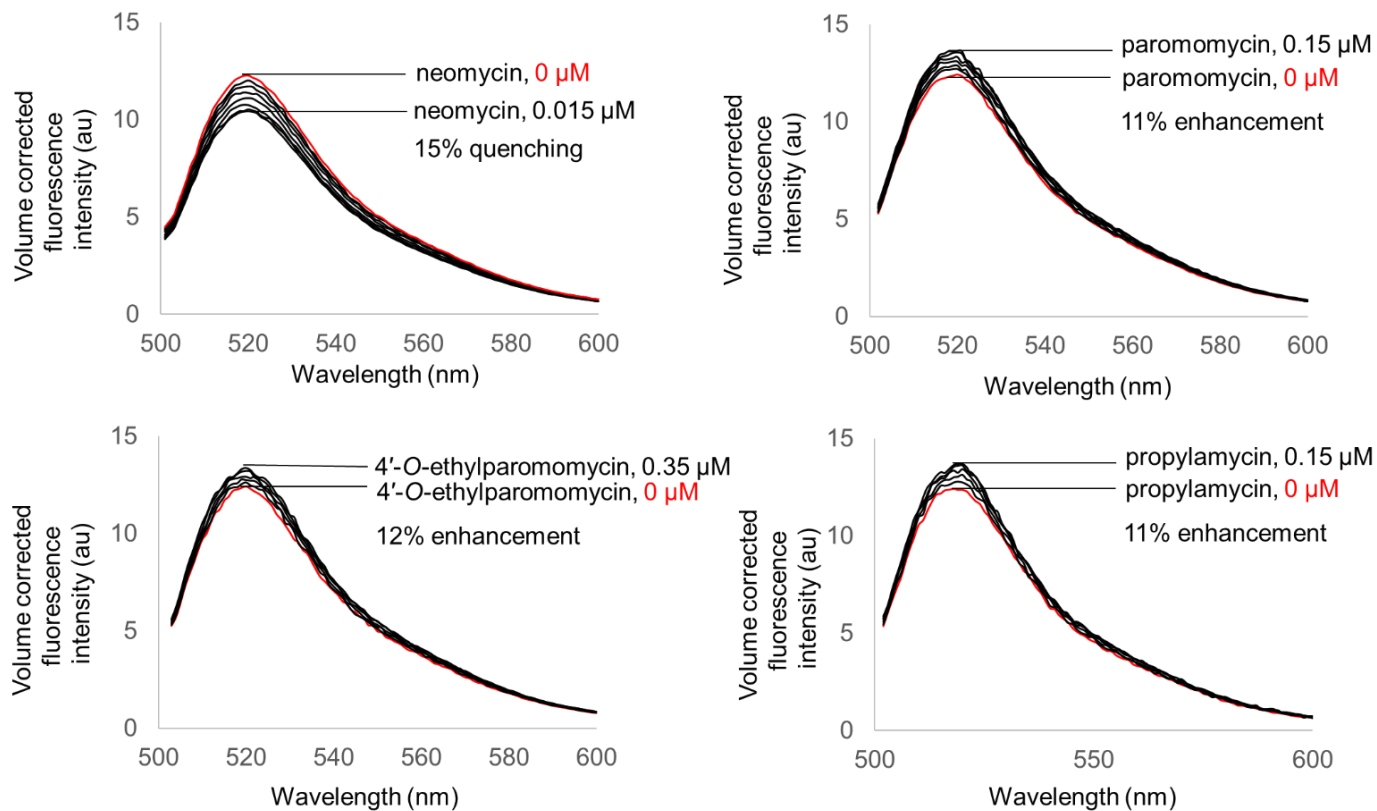

**Figure S4. Aminoglycosides binding to fluorescein-tagged bacterial A-site duplex RNA (wt-bac) construct.** Change in volume corrected fluorescence intensity of fluorescein-tagged RNA upon addition of aminoglycosides are shown.

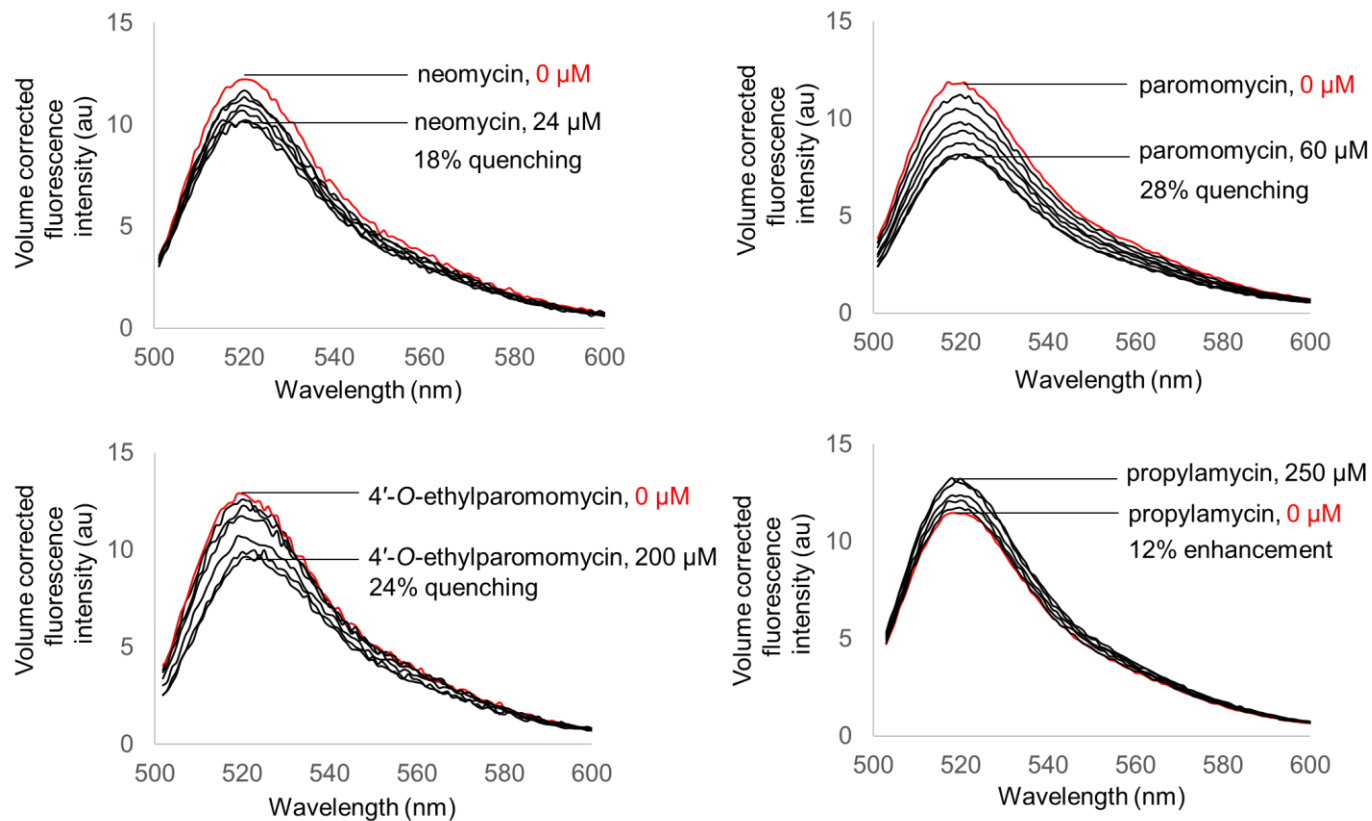

**Figure S5. Aminoglycosides binding to fluorescein-tagged mitochondrial A-site duplex RNA (wt-mt) construct.** Change in volume corrected fluorescence intensity of fluorescein-tagged RNA upon addition of aminoglycosides are shown.

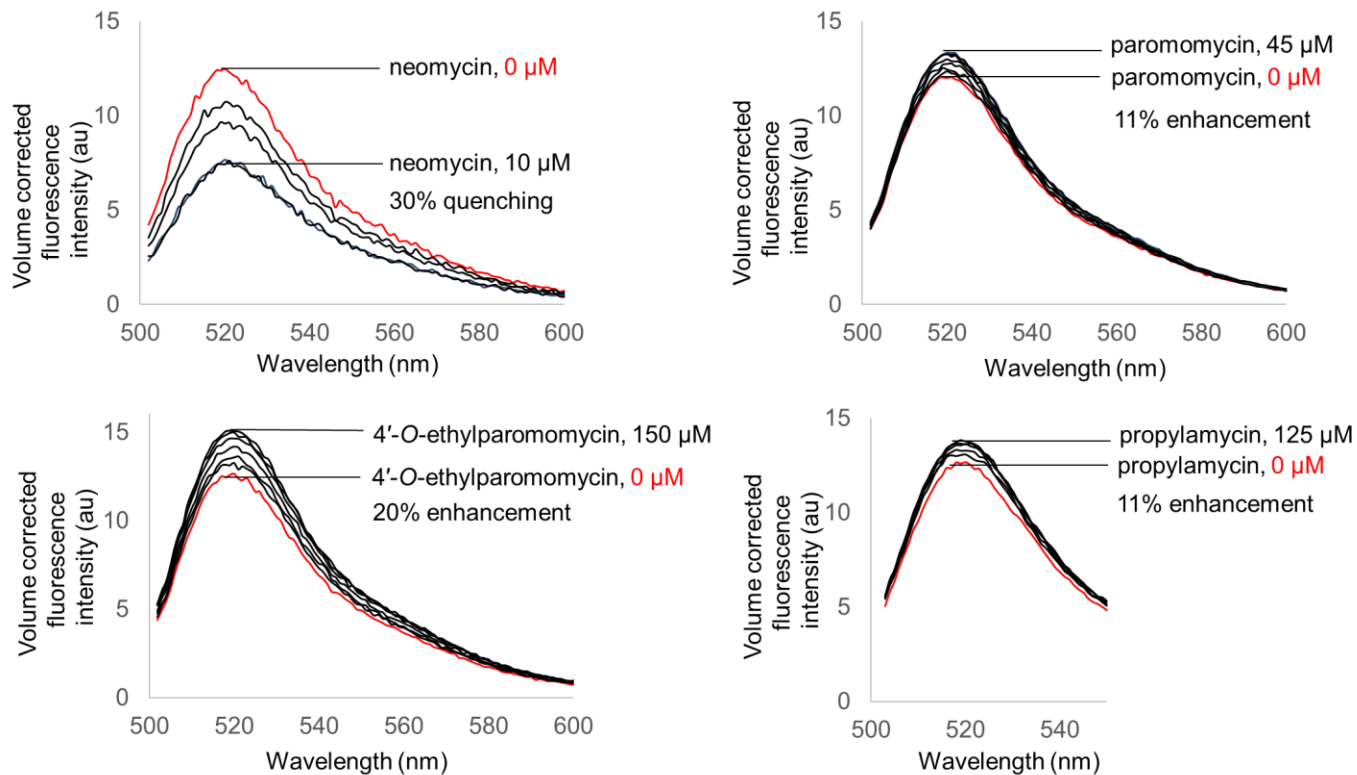

**Figure S5. Aminoglycosides binding to fluorescein-tagged mutant mitochondrial A-site duplex RNA (mut-mt) construct.** Change in volume corrected fluorescence intensity of fluorescein-tagged RNA upon addition of aminoglycosides are shown.
